# Supplementary figures and images for: Nonequilibrium switching of segmental states can influence compaction of chromatin
Source: Royal Society of Chemistry journal article supplement (doi:10.1039/d4sm00274a), 2024-01-01

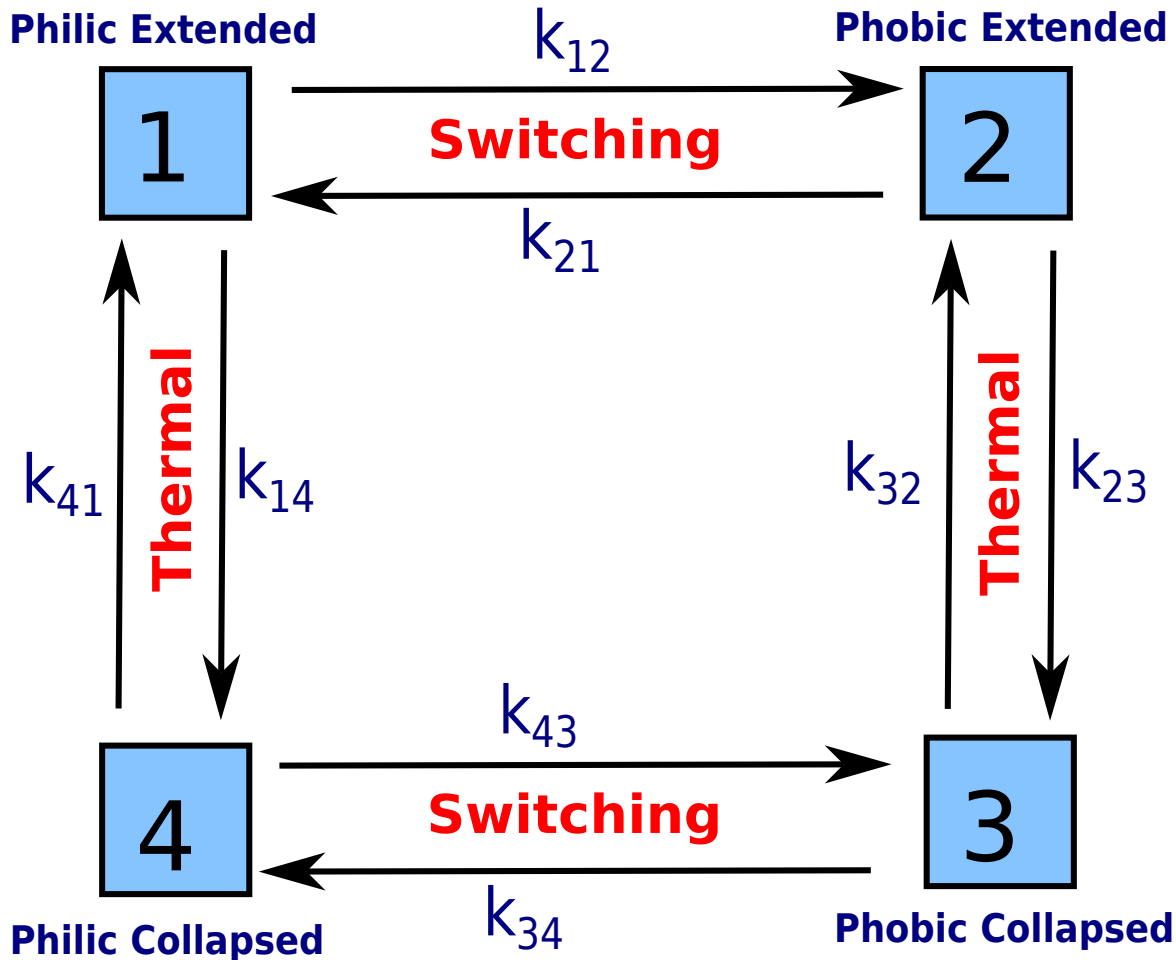

Supplement: d4sm00274a3.pdf [file d4sm00274a3.pdf]

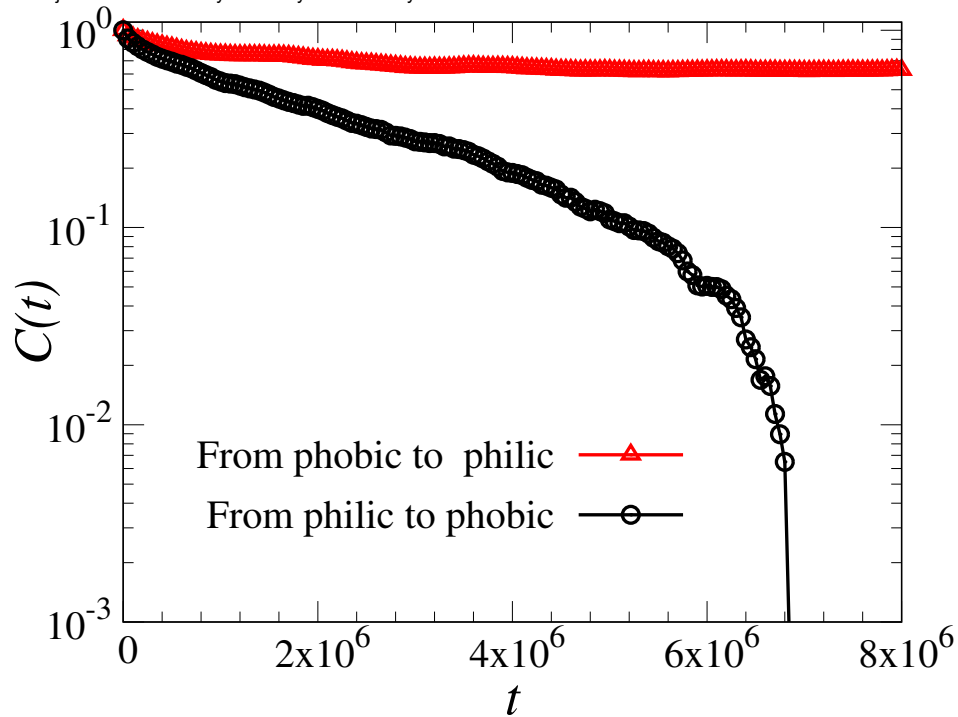

Supplement: d4sm00274a4.pdf [file d4sm00274a4.pdf]

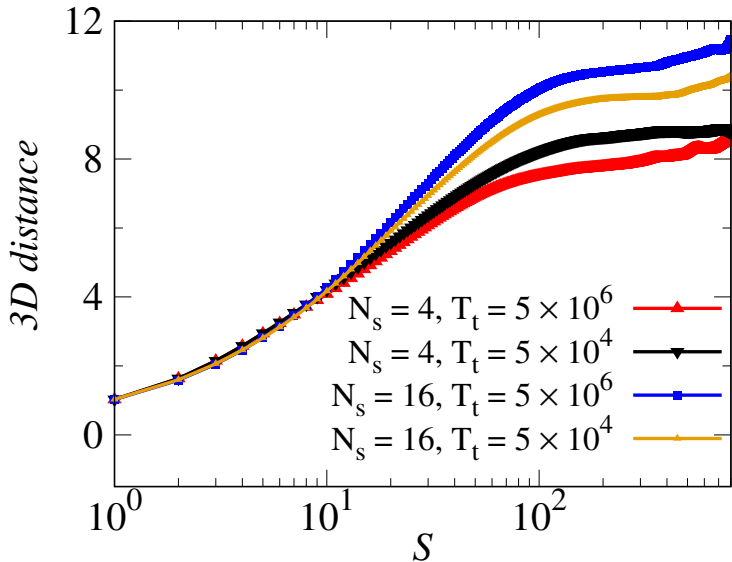

Supplement: d4sm00274a5.pdf [file d4sm00274a5.pdf]

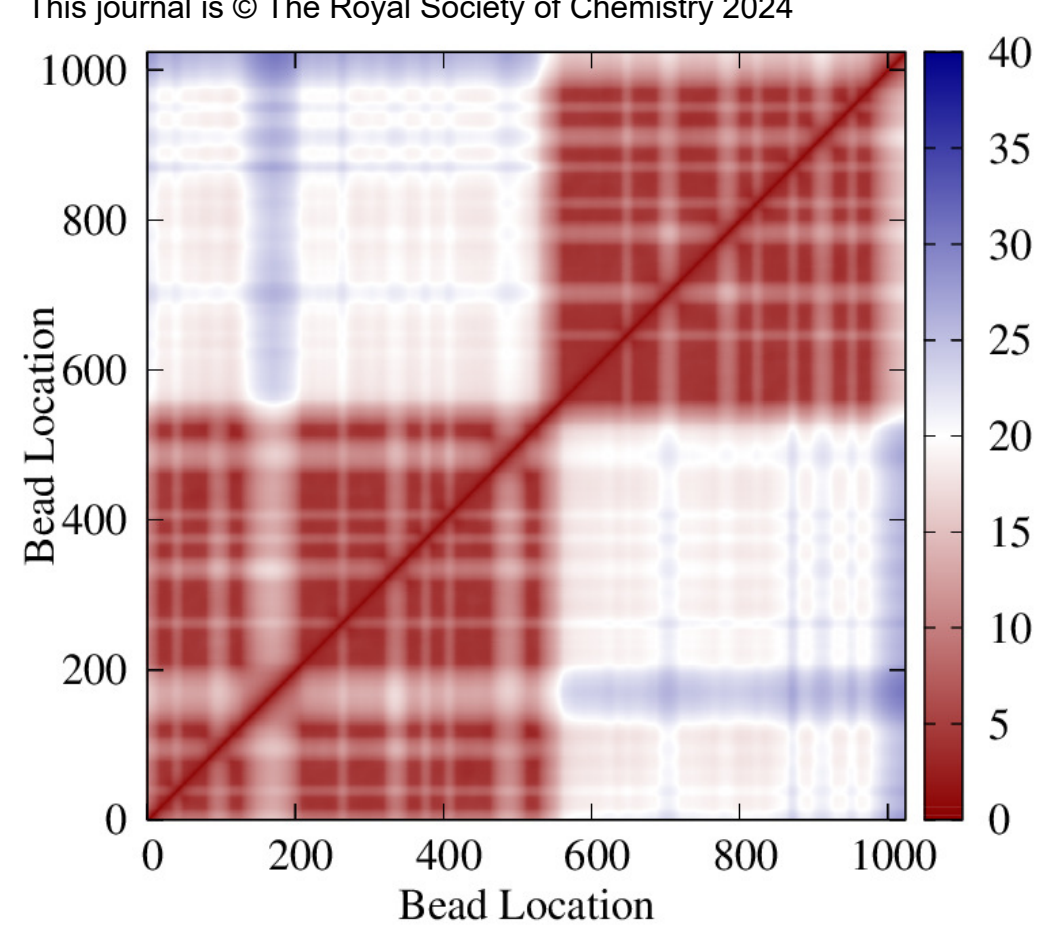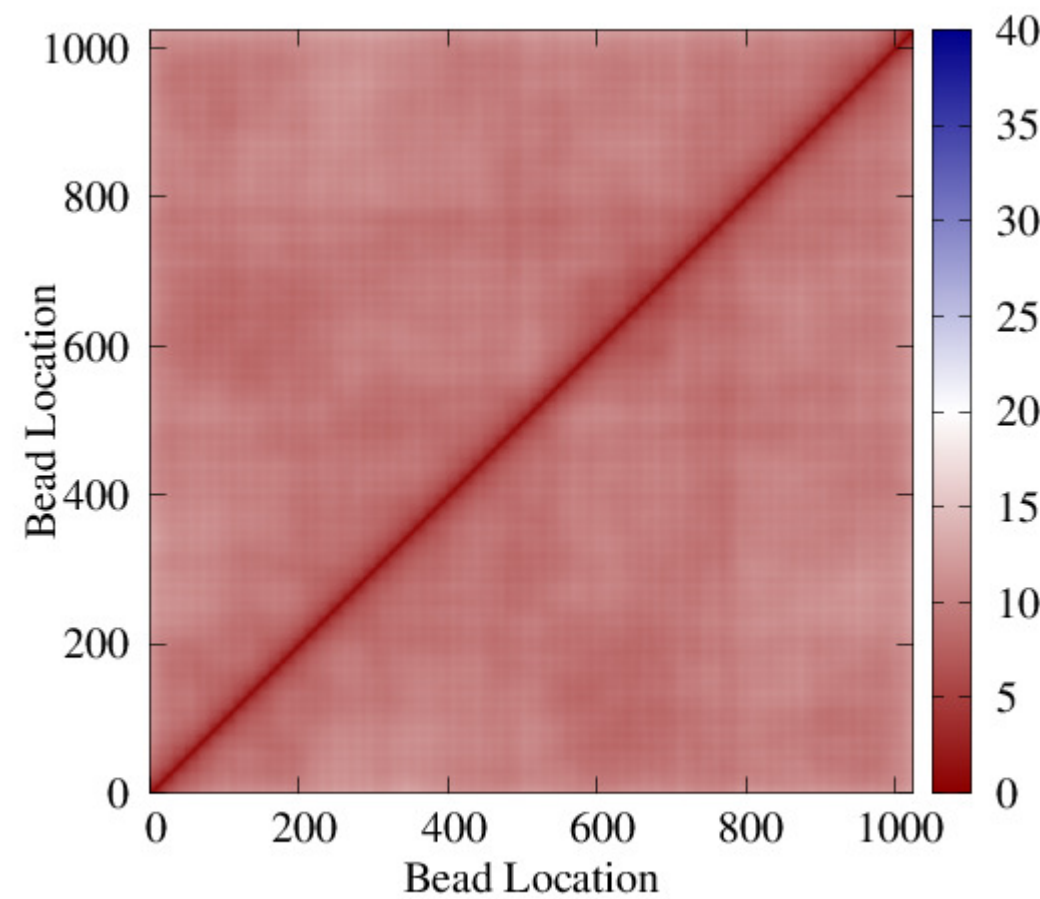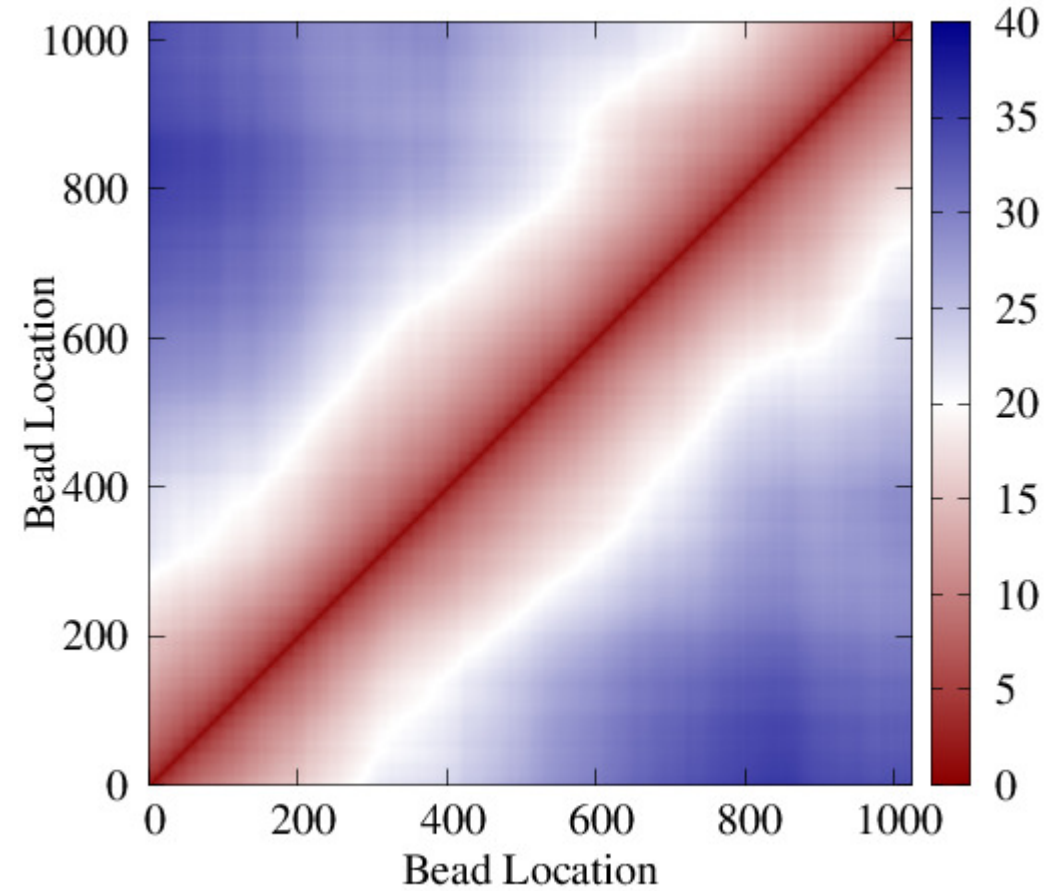

Supplement: d4sm00274a6.pdf [file d4sm00274a6.pdf]
